# Supplementary material
Source: publisher figshare collection journal article supplement (https://karger.figshare.com/ndownloader/files/28735029)
Supplement: Supplementary file 1 [file 28735029]

**Suppl Table 1**. Baseline characteristics of patients with fasting plasma glucose (FPG) levels available vs those without FPG

|  | FPG available  (n=3778) | FPG not available  (n=1292) | P |
| --- | --- | --- | --- |
| Age (years), mean ± SD | 67.7±10.3 | 67.1±11.2 | 0.11 |
| Age >75 years, n (%) | 939 (24.9) | 344 (26.6) | 0.21 |
| Females, n (%) | 736 (19.5) | 272 (21.1) | 0.22 |
| BMI (kg/m2), mean ± SD | 27.4±4.0 | 27.2±4.0 | 0.03 |
| **Risk factors and comorbidities, n (%)** | | | |
| Active smokers | 659 (17.4) | 228 (17.7) | 0.87 |
| Hypercholesterolaemia | 2858 (75.7) | 932 (72.1) | 0.01 |
| Diabetes mellitus | 1221 (32.3) | 337 (26.1) | <0.0001 |
| Hypertension | 3020 (79.9) | 1004 (77.7) | 0.09 |
| Chronic renal dysfunction* | 477 (12.6) | 125 (9.7) | 0.005 |
| Peripheral artery disease | 366 (9.7) | 85 (6.6) | 0.0007 |
| COPD | 461 (12.2) | 142 (11.0) | 0.25 |
| Malignancy | 257 (6.8) | 74 (5.7) | 0.18 |
| **Cardiovascular history, n (%)** | | | |
| Previous stroke/TIA | 221 (5.9) | 55 (4.3) | 0.03 |
| History of major bleeding | 78 (2.1) | 17 (1.3) | 0.9 |
| Atrial fibrillation | 521 (13.8) | 174 (13.5) | 0.78 |
| History of heart failure | 515 (13.6) | 165 (12.8) | 0.43 |
| Prior MI | 2504 (66.3) | 920 (71.2) | 0.001 |
| Previous revascularization | 2937 (77.7) | 1029 (79.6) | 0.15 |
